# Supplementary material for: Empirically corrected DFT and semi-empirical methods for non-bonding interactions
Source: Royal Society of Chemistry journal article supplement (doi:10.1039/b912859j), 2009-11-07
Supplement: b912859j.pdf [file b912859j.pdf]

## Supporting Information

| No.                                                | Molecule (symmetry)              | Ref. Values | B97-D / TZV(2df,2pd) | BLYP-D / TZV(2df,2pd) | B2PLYP-D/TZVPP |
|----------------------------------------------------|----------------------------------|-------------|----------------------|-----------------------|----------------|
| Hydrogen bonded complexes                          |                                  |             |                      |                       |                |
| 1                                                  | (NH3)2 (C2h)                     | -3.17       | -3.72                | -4.16                 | -3.65          |
| 2                                                  | (H2O)2 (Cs)                      | -5.02       | -5.07                | -5.80                 | -5.47          |
| 3                                                  | Formic acid dimer (C2h)          | -18.61      | -18.25               | -19.34                | -19.43         |
| 4                                                  | Formamide dimer (C2h)            | -15.96      | -15.28               | -16.39                | -16.37         |
| 5                                                  | Uracil dimer (C2h)               | -20.65      | -19.45               | -20.73                | -20.88         |
| 6                                                  | 2-Pyridoxine2-aminopyridine (C1) | -16.71      | -17.13               | -18.05                | -17.60         |
| 7                                                  | Adenine thymine WC (C1)          | -16.37      | -16.20               | -17.19                | -16.85         |
| Complexes with predominant dispersion contribution |                                  |             |                      |                       |                |
| 8                                                  | (CH4)2 (D3d)                     | -0.53       | -0.57                | -0.36                 | -0.40          |
| 9                                                  | (C2H4)2 (D2d)                    | -1.51       | -1.55                | -1.55                 | -1.50          |
| 10                                                 | Benzene CH4 (C3)                 | -1.50       | -1.51                | -1.37                 | -1.42          |
| 11                                                 | Benzene dimer (C2h)              | -2.73       | -2.67                | -2.35                 | -2.52          |
| 12                                                 | Pyrazine dimer (Cs)              | -4.42       | -4.07                | -4.05                 | -4.26          |
| 13                                                 | Uracil dimer (C2)                | -10.12      | -10.02               | -10.50                | -10.14         |
| 14                                                 | Indole benzene (C1)              | -5.22       | -4.72                | -4.55                 | -4.69          |
| 15                                                 | Adenine thymine stack (C1)       | -12.23      | -12.11               | -12.85                | -12.52         |
| Mixed complexes                                    |                                  |             |                      |                       |                |
| 16                                                 | Ethene ethine (C2v)              | -1.53       | -1.73                | -1.62                 | -1.60          |
| 17                                                 | Benzene H2O (Cs)                 | -3.28       | -4.14                | -4.16                 | -3.66          |
| 18                                                 | Benzene NH3 (Cs)                 | -2.35       | -2.75                | -2.66                 | -2.47          |
| 19                                                 | Benzene HCN (Cs)                 | -4.46       | -4.88                | -4.87                 | -4.96          |
| 20                                                 | Benzene dimer (C2v)              | -2.74       | -2.93                | -2.76                 | -2.82          |
| 21                                                 | Indole benzene T-shape (C1)      | -5.73       | -6.26                | -6.16                 | -6.04          |
| 22                                                 | Phenol dimer (C1)                | -7.05       | -6.60                | -7.35                 | -7.28          |
|                                                    | RMSE (Hydrogen bonded)           |             | 0.60                 | 0.83                  | 0.58           |
|                                                    | RMSE (Dispersion bonded)         |             | 0.22                 | 0.40                  | 0.24           |
|                                                    | RMSE (Mixed bonded)              |             | 0.48                 | 0.43                  | 0.29           |
|                                                    | RMSE                             |             | 0.46                 | 0.58                  | 0.39           |
|                                                    | MUE                              |             | 0.35                 | 0.47                  | 0.31           |

Table S1: Single-point interaction energies (kcal/mol) at the S22 geometries.

| No.                                                | Molecule (symmetry)              | Ref. Values | TPSS / LP | TPSS / LP CP | TPSS-D / LP | TPSS-D / LP CP |
|----------------------------------------------------|----------------------------------|-------------|-----------|--------------|-------------|----------------|
| Hydrogen bonded complexes                          |                                  |             |           |              |             |                |
| 1                                                  | (NH3)2 (C2h)                     | -3.17       | -2.3      | -2.2         | -3.0        | -3.1           |
| 2                                                  | (H2O)2 (Cs)                      | -5.02       | -4.9      | -4.4         | -5.5        | -5.2           |
| 3                                                  | Formic acid dimer (C2h)          | -18.61      | -18.3     | -17.5        | -19.8       | -19.2          |
| 4                                                  | Formamide dimer (C2h)            | -15.96      | -14.4     | -13.9        | -16.1       | -15.9          |
| 5                                                  | Uracil dimer (C2h)               | -20.65      | -18.2     | -17.6        | -20.5       | -20.2          |
| 6                                                  | 2-Pyridoxine2-aminopyridine (C1) | -16.71      | -14.6     | -14.2        | -17.5       | -17.5          |
| 7                                                  | Adenine thymine WC (C1)          | -16.37      | -13.6     | -13.1        | -16.7       | -16.7          |
| Complexes with predominant dispersion contribution |                                  |             |           |              |             |                |
| 8                                                  | (CH4)2 (D3d)                     | -0.53       | 0.2       | 0.2          | -0.7        | -0.7           |
| 9                                                  | (C2H4)2 (D2d)                    | -1.51       | 0.2       | 0.3          | -1.8        | -2.5           |
| 10                                                 | Benzene CH4 (C3)                 | -1.50       | 0.1       | 0.5          | -1.7        | -1.5           |
| 11                                                 | Benzene dimer (C2h)              | -2.73       | 2.1       | 3.0          | -3.3        | -2.6           |
| 12                                                 | Pyrazine dimer (Cs)              | -4.42       | 1.3       | 1.9          | -4.2        | -3.9           |
| 13                                                 | Uracil dimer (C2)                | -10.12      | -2.2      | -1.0         | -9.8        | -9.2           |
| 14                                                 | Indole benzene (C1)              | -5.22       | 2.4       | 3.7          | -5.4        | -4.5           |
| 15                                                 | Adenine thymine stack (C1)       | -12.23      | -0.6      | 0.8          | -11.9       | -11.4          |
| Mixed complexes                                    |                                  |             |           |              |             |                |
| 16                                                 | Ethene ethine (C2v)              | -1.53       | -1.0      | -0.8         | -1.7        | -1.3           |
| 17                                                 | Benzene H2O (Cs)                 | -3.28       | -2.1      | -1.4         | -3.6        | -3.2           |
| 18                                                 | Benzene NH3 (Cs)                 | -2.35       | -0.8      | -0.3         | -2.5        | -2.3           |
| 19                                                 | Benzene HCN (Cs)                 | -4.46       | -2.8      | -2.2         | -4.4        | -4.1           |
| 20                                                 | Benzene dimer (C2v)              | -2.74       | 0.0       | 0.6          | -2.6        | -2.3           |
| 21                                                 | Indole benzene T-shape (C1)      | -5.73       | -1.8      | -1.0         | -5.4        | -4.8           |
| 22                                                 | Phenol dimer (C1)                | -7.05       | -3.5      | -2.9         | -6.9        | -6.7           |
|                                                    | RMSE (Hydrogen bonded)           |             | 1.7       | 2.2          | 0.6         | 0.4            |
|                                                    | RMSE (Dispersion bonded)         |             | 6.3       | 7.2          | 0.3         | 0.6            |
|                                                    | RMSE (Mixed bonded)              |             | 2.5       | 3.0          | 0.2         | 0.4            |
|                                                    | RMSE                             |             | 4.2       | 4.8          | 0.4         | 0.5            |
|                                                    | MUE                              |             | 3.0       | 3.7          | 0.3         | 0.4            |

Table 2: Single-point interaction energies (kcal/mol) at the S22 geometries. LP = 6-311++G(3df,3pd).

| No.                                                | Molecule (symmetry)                                              | Interaction Energies (kcal/mol) |                     | Interaction Distances (Å) |                     | CM-Distances (Å) |                     |
|----------------------------------------------------|------------------------------------------------------------------|---------------------------------|---------------------|---------------------------|---------------------|------------------|---------------------|
|                                                    |                                                                  | Ref. Values                     | BLYP-D / TZV(2d,2p) | Ref. Values               | BLYP-D / TZV(2d,2p) | Ref. Values      | BLYP-D / TZV(2d,2p) |
| Hydrogen bonded complexes                          |                                                                  |                                 |                     |                           |                     |                  |                     |
| 1                                                  | (NH <sub>3</sub> ) <sub>2</sub> (C <sub>2h</sub> )               | -3.17                           | -3.58               | 2.504                     | 2.595               | 3.209            | 3.305               |
| 2                                                  | (H <sub>2</sub> O) <sub>2</sub> (Cs)                             | -5.02                           | -5.98               | 1.952                     | 1.961               | 2.909            | 2.927               |
| 3                                                  | Formic acid dimer (C <sub>2h</sub> )                             | -18.61                          | -16.62              | 1.670                     | 1.674               | 2.993            | 3.017               |
| 4                                                  | Formamide dimer (C <sub>2h</sub> )                               | -15.96                          | -14.91              | 1.841                     | 1.864               | 3.229            | 3.267               |
| 5                                                  | Uracil dimer (C <sub>2h</sub> )                                  | -20.65                          | -18.41              | 1.775                     | 1.789               | 6.075            | 6.127               |
| 6                                                  | 2-Pyridoxine2-aminopyridine (C <sub>1</sub> )                    | -16.71                          | -16.20              | 1.859, 1.874              | 1.846, 1.851        | 5.136            | 5.165               |
| 7                                                  | Adenine thymine WC (C <sub>1</sub> )                             | -16.37                          | -15.48              | 1.819, 1.929              | 1.786, 1.908        | 5.974            | 5.99                |
| Complexes with predominant dispersion contribution |                                                                  |                                 |                     |                           |                     |                  |                     |
| 8                                                  | (CH <sub>4</sub> ) <sub>2</sub> (D <sub>3d</sub> )               | -0.53                           | -0.32               | 3.718                     | 3.717               | 3.718            | 3.716               |
| 9                                                  | (C <sub>2</sub> H <sub>4</sub> ) <sub>2</sub> (D <sub>2d</sub> ) | -1.51                           | -1.39               | 3.718                     | 3.712               | 3.718            | 3.712               |
| 10                                                 | Benzene CH <sub>4</sub> (C <sub>3</sub> )                        | -1.50                           | -0.94               | 3.716                     | 3.732               | 3.716            | 3.732               |
| 11                                                 | Benzene dimer (C <sub>2h</sub> )                                 | -2.73                           | -2.01               | 3.765                     | 3.775               | 3.765            | 3.772               |
| 12                                                 | Pyrazine dimer (Cs)                                              | -4.42                           | -3.76               | 3.479                     | 3.631               | 3.479            | 3.628               |
| 13                                                 | Uracil dimer (C <sub>2</sub> )                                   | -10.12                          | -9.01               | 3.166                     | 2.807               | 3.166            | 3.223               |
| 14                                                 | Indole benzene (C <sub>1</sub> )                                 | -5.22                           | -4.20               | 3.498                     | 3.574               | 3.498            | 3.724               |
| 15                                                 | Adenine thymine stack (C <sub>1</sub> )                          | -12.23                          | -11.20              | 3.172                     | 3.259               | 3.172            | 3.268               |
| Mixed complexes                                    |                                                                  |                                 |                     |                           |                     |                  |                     |
| 16                                                 | Ethene ethine (C <sub>2v</sub> )                                 | -1.53                           | -1.46               | 2.752                     | 2.755               | 4.422            | 4.428               |
| 17                                                 | Benzene H <sub>2</sub> O (Cs)                                    | -3.28                           | -3.72               | 2.531                     | 3.330               | 3.380            | 3.262               |
| 18                                                 | Benzene NH <sub>3</sub> (Cs)                                     | -2.35                           | -2.14               | 3.592                     | 3.628               | 3.560            | 3.596               |
| 19                                                 | Benzene HCN (Cs)                                                 | -4.46                           | -4.08               | 3.387                     | 3.510               | 3.950            | 4.068               |
| 20                                                 | Benzene dimer (C <sub>2v</sub> )                                 | -2.74                           | -2.19               | 3.513                     | 3.651               | 4.909            | 5.053               |
| 21                                                 | Indole benzene T-shape (C <sub>1</sub> )                         | -5.73                           | -5.09               | 3.210                     | 3.409               | 4.884            | 5.024               |
| 22                                                 | Phenol dimer (C <sub>1</sub> )                                   | -7.05                           | -6.94               | 1.937, 4.921              | 1.921, 5.084        | 4.921            | 5.084               |
|                                                    | RMSE (Hydrogen bonded)                                           |                                 | 1.32                |                           | 0.035               |                  | 0.047               |
|                                                    | RMSE (Dispersion bonded)                                         |                                 | 0.76                |                           | 0.144               |                  | 0.104               |
|                                                    | RMSE (Mixed bonded)                                              |                                 | 0.40                |                           | 0.304               |                  | 0.117               |
|                                                    | RMSE                                                             |                                 | 0.90                |                           | 0.192               |                  | 0.095               |
|                                                    | MUE                                                              |                                 | 0.72                |                           | 0.097               |                  | 0.071               |

Table 3: Geometry optimized energies (kcal/mol), interaction distances (Angstroms), and CM-distance (Angstroms) for the complexes in the S22 database. The interaction distance is defined as the CM-distance for complexes 11-15 and the 2<sup>nd</sup> distance reported for complex 22.

| No.                                                | Molecule (symmetry)                                              | Ref. Values |             | TPSS / LP |             | TPSS-D / LP |             |                           |
|----------------------------------------------------|------------------------------------------------------------------|-------------|-------------|-----------|-------------|-------------|-------------|---------------------------|
|                                                    |                                                                  | ΔE          | CM Distance | ΔE        | CM Distance | ΔE          | CM Distance | Interaction Distances (Å) |
| Hydrogen bonded complexes                          |                                                                  |             |             |           |             |             |             |                           |
| 1                                                  | (NH <sub>3</sub> ) <sub>2</sub> (C <sub>2h</sub> )               | -3.17       | 3.209       | -2.4      | 3.257       | -3.1        | 3.324       | 2.635                     |
| 2                                                  | (H <sub>2</sub> O) <sub>2</sub> (Cs)                             | -5.02       | 2.909       | -5.0      | 2.891       | -5.6        | 2.897       | 1.928                     |
| 3                                                  | Formic acid dimer (C <sub>2h</sub> )                             | -18.61      | 2.993       | -20.7     | 2.964       | -22.4       | 2.955       | 1.608                     |
| 4                                                  | Formamide dimer (C <sub>2h</sub> )                               | -15.96      | 3.229       | -15.3     | 3.210       | -17.0       | 3.205       | 1.800                     |
| 5                                                  | Uracil dimer (C <sub>2h</sub> )                                  | -20.65      | 6.075       | -19.1     | 6.074       | -21.5       | 6.055       | 1.731                     |
| 6                                                  | 2-Pyridoxine2-aminopyridine (C <sub>1</sub> )                    | -16.71      | 5.136       | -15.9     | 5.134       | -18.9       | 5.104       | 1.804, 1.800              |
| 7                                                  | Adenine thymine WC (C <sub>1</sub> )                             | -16.37      | 5.974       | -14.6     | 5.969       | -17.9       | 5.938       | 1.752, 1.851              |
| Complexes with predominant dispersion contribution |                                                                  |             |             |           |             |             |             |                           |
| 8                                                  | (CH <sub>4</sub> ) <sub>2</sub> (D <sub>3d</sub> )               | -0.53       | 3.718       | 0.0       | 3.923       | -0.7        | 3.719       | 3.719                     |
| 9                                                  | (C <sub>2</sub> H <sub>4</sub> ) <sub>2</sub> (D <sub>2d</sub> ) | -1.51       | 3.718       | -0.3      | 4.202       | -1.8        | 3.718       | 3.735                     |
| 10                                                 | Benzene CH <sub>4</sub> (C <sub>3</sub> )                        | -1.50       | 3.716       | 0.1       | 3.723       | -1.7        | 3.721       | 3.721                     |
| 11                                                 | Benzene dimer (C <sub>2h</sub> )                                 | -2.73       | 3.765       | 0.0       | 4.638       | -3.3        | 3.769       | 3.769                     |
| 12                                                 | Pyrazine dimer (Cs)                                              | -4.42       | 3.479       | -0.6      | 4.322       | -4.3        | 3.575       | 3.575                     |
| 13                                                 | Uracil dimer (C <sub>2</sub> )                                   | -10.12      | 3.166       | -3.5      | 3.800       | -10.2       | 3.172       | 3.172                     |
| 14                                                 | Indole benzene (C <sub>1</sub> )                                 | -5.22       | 3.498       | -0.7      | 4.637       | -5.4        | 3.515       | 3.515                     |
| 15                                                 | Adenine thymine stack (C <sub>1</sub> )                          | -12.23      | 3.172       | -6.7      | 4.525       | -12.0       | 3.224       | 3.224                     |
| Mixed complexes                                    |                                                                  |             |             |           |             |             |             |                           |
| 16                                                 | Ethene ethine (C <sub>2v</sub> )                                 | -1.53       | 4.422       | -1.0      | 4.445       | -1.6        | 4.437       | 2.768                     |
| 17                                                 | Benzene H <sub>2</sub> O (Cs)                                    | -3.28       | 3.380       | -2.2      | 3.544       | -3.6        | 3.386       | 2.531                     |
| 18                                                 | Benzene NH <sub>3</sub> (Cs)                                     | -2.35       | 3.560       | -1.0      | 3.845       | -2.5        | 3.567       | 3.599                     |
| 19                                                 | Benzene HCN (Cs)                                                 | -4.46       | 3.950       | -2.8      | 3.956       | -4.4        | 3.951       | 3.395                     |
| 20                                                 | Benzene dimer (C <sub>2v</sub> )                                 | -2.74       | 4.909       | -0.8      | 5.411       | -2.9        | 5.134       | 3.738                     |
| 21                                                 | Indole benzene T-shape (C <sub>1</sub> )                         | -5.73       | 4.884       | -2.5      | 5.279       | -5.3        | 4.891       | 3.241                     |
| 22                                                 | Phenol dimer (C <sub>1</sub> )                                   | -7.05       | 4.921       | -4.4      | 5.420       | -7.2        | 4.983       | 1.924, 4.983              |
|                                                    | RMSE (Hydrogen bonded)                                           |             |             | 1.3       | 0.023       | 1.8         | 0.051       | 0.070                     |
|                                                    | RMSE (Dispersion bonded)                                         |             |             | 3.9       | 0.812       | 0.3         | 0.039       | 0.040                     |
|                                                    | RMSE (Mixed bonded)                                              |             |             | 2.0       | 0.331       | 0.2         | 0.089       | 0.084                     |
|                                                    | RMSE                                                             |             |             | 2.7       | 0.524       | 1.1         | 0.062       | 0.067                     |
|                                                    | MUE                                                              |             |             | 2.1       | 0.342       | 0.6         | 0.036       | 0.045                     |

Table 4: Geometry optimized interaction energies (kcal/mol) and CM-distances (Angstroms) for the complexes in the S22 database. LP = 6-311++G(3df,3pd). The

interaction distance is defined as the CM-distance in complexes 11-15 and 2<sup>nd</sup> value reported for complex 22.

| No.                                                | Molecule (symmetry)              | Ref. Values | AM1    | PM3    | AM1-D <sup>a</sup> | AM1-D  | PM3-D  | PM3-D* |
|----------------------------------------------------|----------------------------------|-------------|--------|--------|--------------------|--------|--------|--------|
| Hydrogen bonded complexes                          |                                  |             |        |        |                    |        |        |        |
| 1                                                  | (NH3)2 (C2h)                     | -3.17       | -0.78  | 0.77   | -2.35              | -3.43  | -1.77  | -0.67  |
| 2                                                  | (H2O)2 (Cs)                      | -5.02       | -2.89  | -2.79  | -3.74              | -7.29  | -5.14  | -4.53  |
| 3                                                  | Formic acid dimer (C2h)          | -18.61      | 1.54   | -9.91  | -1.24              | -15.45 | -18.57 | -17.46 |
| 4                                                  | Formamide dimer (C2h)            | -15.96      | -12.02 | -8.08  | -8.67              | -17.16 | -15.37 | -10.32 |
| 5                                                  | Uracil dimer (C2h)               | -20.65      | -5.79  | -11.32 | -9.48              | -20.15 | -20.3  | -19.88 |
| 6                                                  | 2-Pyridoxine2-aminopyridine (C1) | -16.71      | -4.45  | -7.46  | -8.84              | -16.50 | -17.52 | -13.50 |
| 7                                                  | Adenine thymine WC (C1)          | -16.37      | -4.28  | -6.79  | -8.95              | -16.58 | -17.33 | -13.89 |
| Complexes with predominant dispersion contribution |                                  |             |        |        |                    |        |        |        |
| 8                                                  | (CH4)2 (D3d)                     | -0.53       | 0.21   | -0.25  | -0.70              | -0.94  | -1.24  | -1.00  |
| 9                                                  | (C2H4)2 (D2d)                    | -1.51       | -0.13  | -1.11  | -2.48              | -3.31  | -3.60  | -2.44  |
| 10                                                 | Benzene CH4 (C3)                 | -1.50       | 0.40   | -0.19  | -2.00              | -2.12  | -2.42  | -1.83  |
| 11                                                 | Benzene dimer (C2h)              | -2.73       | 3.52   | 2.38   | -2.79              | -2.90  | -4.30  | -4.41  |
| 12                                                 | Pyrazine dimer (Cs)              | -4.42       | 2.49   | 3.90   | -4.38              | -4.57  | -4.20  | -4.83  |
| 13                                                 | Uracil dimer (C2)                | -10.12      | 0.12   | 5.80   | -9.87              | -10.56 | -6.78  | -10.78 |
| 14                                                 | Indole benzene (C1)              | -5.22       | 5.39   | 4.04   | -4.04              | -4.04  | -6.09  | -5.68  |
| 15                                                 | Adenine thymine stack (C1)       | -12.23      | 2.91   | 7.37   | -11.74             | -12.20 | -10.63 | -11.58 |
| Mixed complexes                                    |                                  |             |        |        |                    |        |        |        |
| 16                                                 | Ethene ethine (C2v)              | -1.53       | -0.35  | -0.82  | -1.45              | -1.61  | -1.85  | -1.41  |
| 17                                                 | Benzene H2O (Cs)                 | -3.28       | -0.69  | -1.47  | -3.29              | -3.43  | -3.65  | -2.71  |
| 18                                                 | Benzene NH3 (Cs)                 | -2.35       | -0.33  | -0.59  | -2.85              | -3.00  | -2.96  | -1.97  |
| 19                                                 | Benzene HCN (Cs)                 | -4.46       | -0.81  | -1.63  | -4.27              | -4.44  | -4.43  | -3.05  |
| 20                                                 | Benzene dimer (C2v)              | -2.74       | 0.37   | -0.43  | -3.68              | -3.85  | -4.15  | -2.90  |
| 21                                                 | Indole benzene T-shape (C1)      | -5.73       | -1.05  | -1.25  | -6.96              | -7.10  | -6.65  | -4.60  |
| 22                                                 | Phenol dimer (C1)                | -7.05       | -1.36  | -1.37  | -5.86              | -9.76  | -7.52  | -5.57  |
|                                                    | RMSE (Hydrogen bonded)           |             | 11.64  | 7.77   | 9.25               | 1.56   | 0.76   | 2.85   |
|                                                    | RMSE (Dispersion bonded)         |             | 8.21   | 10.13  | 0.61               | 0.82   | 1.68   | 0.81   |
|                                                    | RMSE (Mixed bonded)              |             | 3.57   | 3.22   | 0.77               | 1.25   | 0.72   | 0.92   |
|                                                    | RMSE                             |             | 8.47   | 7.73   | 5.25               | 1.23   | 1.18   | 1.76   |
|                                                    | MUE                              |             | 6.54   | 5.94   | 2.77               | 0.85   | 0.90   | 1.23   |

Table 5: Single-point interaction energies (kcal/mol) at the S22 geometries. <sup>a</sup> AM1-D results without re-parameterization of AM1 method ( $S_6=1.1$  and  $d=23.0$ ).

| No.                                                | Molecule (symmetry)              | Ref. Values | AM1    | PM3    | AM1-D  | PM3-D  | PM3-D* |
|----------------------------------------------------|----------------------------------|-------------|--------|--------|--------|--------|--------|
| Hydrogen bonded complexes                          |                                  |             |        |        |        |        |        |
| 1                                                  | (NH3)2 (C2h)                     | -3.17       | -1.39  | -0.71  | -3.03  | -1.99  | -2.12  |
| 2                                                  | (H2O)2 (Cs)                      | -5.02       | -3.30  | -3.55  | -7.22  | -6.53  | -4.04  |
| 3                                                  | Formic acid dimer (C2h)          | -18.61      | -6.62  | -9.58  | -12.45 | -16.16 | -19.71 |
| 4                                                  | Formamide dimer (C2h)            | -15.96      | -2.06  | -6.99  | -14.64 | -14.42 | -10.05 |
| 5                                                  | Uracil dimer (C2h)               | -20.65      | -10.48 | -10.70 | -17.80 | -18.83 | -22.19 |
| 6                                                  | 2-Pyridoxine2-aminopyridine (C1) | -16.71      | -6.15  | -7.06  | -13.06 | -18.32 | -13.70 |
| 7                                                  | Adenine thymine WC (C1)          | -16.37      | -5.06  | -6.90  | -12.66 | -18.66 | -16.29 |
| Complexes with predominant dispersion contribution |                                  |             |        |        |        |        |        |
| 8                                                  | (CH4)2 (D3d)                     | -0.53       | -0.21  | -0.32  | -4.10  | -2.38  | -1.14  |
| 9                                                  | (C2H4)2 (D2d)                    | -1.51       | -0.13  | -1.08  | -4.85  | -4.11  | -2.37  |
| 10                                                 | Benzene CH4 (C3)                 | -1.50       | 0.35   | -0.20  | -2.93  | -2.88  | -1.84  |
| 11                                                 | Benzene dimer (C2h)              | -2.73       | 0.01   | -0.02  | -3.10  | -4.59  | -4.82  |
| 12                                                 | Pyrazine dimer (Cs)              | -4.42       | -0.34  | -0.26  | -4.87  | -4.45  | -6.36  |
| 13                                                 | Uracil dimer (C2)                | -10.12      | -6.05  | -4.26  | -11.25 | -7.59  | -15.47 |
| 14                                                 | Indole benzene (C1)              | -5.22       | -1.33  | -1.65  | -8.16  | -6.26  | -5.89  |
| 15                                                 | Adenine thymine stack (C1)       | -12.23      | -5.15  | -6.50  | -15.13 | -11.70 | -17.13 |
| Mixed complexes                                    |                                  |             |        |        |        |        |        |
| 16                                                 | Ethene ethine (C2v)              | -1.53       | -0.57  | -1.23  | -2.47  | -2.58  | -1.36  |
| 17                                                 | Benzene H2O (Cs)                 | -3.28       | -1.03  | -1.63  | -3.90  | -4.46  | -2.94  |
| 18                                                 | Benzene NH3 (Cs)                 | -2.35       | -0.80  | -0.93  | -4.04  | -3.99  | -1.99  |
| 19                                                 | Benzene HCN (Cs)                 | -4.46       | -0.92  | -1.85  | -4.28  | -4.40  | -2.88  |
| 20                                                 | Benzene dimer (C2v)              | -2.74       | -0.09  | -0.52  | -4.22  | -4.39  | -2.87  |
| 21                                                 | Indole benzene T-shape (C1)      | -5.73       | -1.24  | -1.67  | -7.74  | -7.20  | -4.87  |
| 22                                                 | Phenol dimer (C1)                | -7.05       | -3.39  | -4.33  | -11.55 | -8.95  | -5.63  |
|                                                    | RMSE (Hydrogen bonded)           |             | 9.90   | 8.04   | 3.38   | 1.82   | 2.66   |
|                                                    | RMSE (Dispersion bonded)         |             | 3.73   | 3.65   | 2.36   | 1.71   | 2.79   |
|                                                    | RMSE (Mixed bonded)              |             | 2.96   | 2.40   | 2.09   | 1.40   | 0.89   |
|                                                    | RMSE                             |             | 6.25   | 5.22   | 2.65   | 1.65   | 2.31   |
|                                                    | MUE                              |             | 4.82   | 4.09   | 2.16   | 1.51   | 1.60   |

Table 6: Geometry optimized interaction energies (kcal/mol) for the S22 complexes.

| No.                                                | Molecule (symmetry)                                              | Ref. Values  | AM1          | PM3          | AM1-D        | PM3-D        |
|----------------------------------------------------|------------------------------------------------------------------|--------------|--------------|--------------|--------------|--------------|
| Hydrogen bonded complexes                          |                                                                  |              |              |              |              |              |
| 1                                                  | (NH <sub>3</sub> ) <sub>2</sub> (C <sub>2h</sub> )               | 2.504        | 2.784        | 3.241        | 2.646        | 2.726        |
| 2                                                  | (H <sub>2</sub> O) <sub>2</sub> (C <sub>s</sub> )                | 1.952        | 2.094        | 1.809        | 1.911        | 1.769        |
| 3                                                  | Formic acid dimer (C <sub>2h</sub> )                             | 1.670        | 2.101        | 1.776        | 1.925        | 1.737        |
| 4                                                  | Formamide dimer (C <sub>2h</sub> )                               | 1.841        | 2.072        | 1.807        | 1.981        | 1.763        |
| 5                                                  | Uracil dimer (C <sub>2h</sub> )                                  | 1.775        | 2.044        | 1.787        | 1.946        | 1.744        |
| 6                                                  | 2-Pyridoxine2-aminopyridine (C <sub>1</sub> )                    | 1.859, 1.874 | 2.511, 2.107 | 1.798, 1.815 | 1.980, 1.981 | 1.722, 1.768 |
| 7                                                  | Adenine thymine WC (C <sub>1</sub> )                             | 1.819, 1.929 | 2.476, 2.101 | 1.780, 1.821 | 1.807, 2.018 | 1.708, 1.769 |
| Complexes with predominant dispersion contribution |                                                                  |              |              |              |              |              |
| 8                                                  | (CH <sub>4</sub> ) <sub>2</sub> (D <sub>3d</sub> )               | 3.718        | 3.721        | 3.447        | 2.881        | 3.160        |
| 9                                                  | (C <sub>2</sub> H <sub>4</sub> ) <sub>2</sub> (D <sub>2d</sub> ) | 3.718        | 3.714        | 3.706        | 3.305        | 3.469        |
| 10                                                 | Benzene CH <sub>4</sub> (C <sub>3</sub> )                        | 3.716        | 3.746        | 3.718        | 3.315        | 3.450        |
| 11                                                 | Benzene dimer (C <sub>2h</sub> )                                 | 3.765        | 6.952        | 6.096        | 3.643        | 3.499        |
| 12                                                 | Pyrazine dimer (C <sub>s</sub> )                                 | 3.479        | 4.848        | 4.760        | 3.695        | 3.437        |
| 13                                                 | Uracil dimer (C <sub>2</sub> )                                   | 3.166        | 5.805        | 6.732        | 3.097        | 3.406        |
| 14                                                 | Indole benzene (C <sub>1</sub> )                                 | 3.498        | 5.572        | 5.520        | 4.448        | 3.415        |
| 15                                                 | Adenine thymine stack (C <sub>1</sub> )                          | 3.172        | 6.202        | 5.788        | 4.320        | 3.280        |
| Mixed complexes                                    |                                                                  |              |              |              |              |              |
| 16                                                 | Ethene ethine (C <sub>2v</sub> )                                 | 2.752        | 2.468        | 2.429        | 2.319        | 2.366        |
| 17                                                 | Benzene H <sub>2</sub> O (C <sub>s</sub> )                       | 2.531        | 4.020        | 3.746        | 2.986        | 2.982        |
| 18                                                 | Benzene NH <sub>3</sub> (C <sub>s</sub> )                        | 3.592        | 4.092        | 4.025        | 2.995        | 3.069        |
| 19                                                 | Benzene HCN (C <sub>s</sub> )                                    | 3.387        | 3.472        | 3.694        | 3.228        | 3.343        |
| 20                                                 | Benzene dimer (C <sub>2v</sub> )                                 | 3.513        | 5.225        | 3.606        | 3.253        | 3.370        |
| 21                                                 | Indole benzene T-shape (C <sub>1</sub> )                         | 3.210        | 3.811        | 3.807        | 3.010        | 3.233        |
| 22                                                 | Phenol dimer (C <sub>1</sub> )                                   | 1.937, 4.921 | 2.174, 5.925 | 1.829, 5.712 | 2.001, 5.040 | 1.778, 5.265 |
|                                                    | RMSE (Hydrogen bonded)                                           |              | 0.387        | 0.257        | 0.137        | 0.134        |
|                                                    | RMSE (Dispersion bonded)                                         |              | 2.015        | 1.962        | 0.644        | 0.272        |
|                                                    | RMSE (Mixed bonded)                                              |              | 0.929        | 0.598        | 0.336        | 0.315        |
|                                                    | RMSE                                                             |              | 1.277        | 1.171        | 0.419        | 0.249        |
|                                                    | MUE                                                              |              | 0.853        | 0.691        | 0.301        | 0.199        |

Table 7: Geometry optimized interaction distances (Angstroms) for the S22 complexes. The interaction distance is defined as the CM-distance in complexes 11-15 and 2<sup>nd</sup> value reported for complex 22.
